# Supplementary figures and images for: Root Proteomics Reveals the Effects of Wood Vinegar on Wheat Growth and Subsequent Tolerance to Drought Stress
Source: MDPI journal article supplement (doi:10.3390/ijms20040943), 2019-02-21

CK WV (Master)

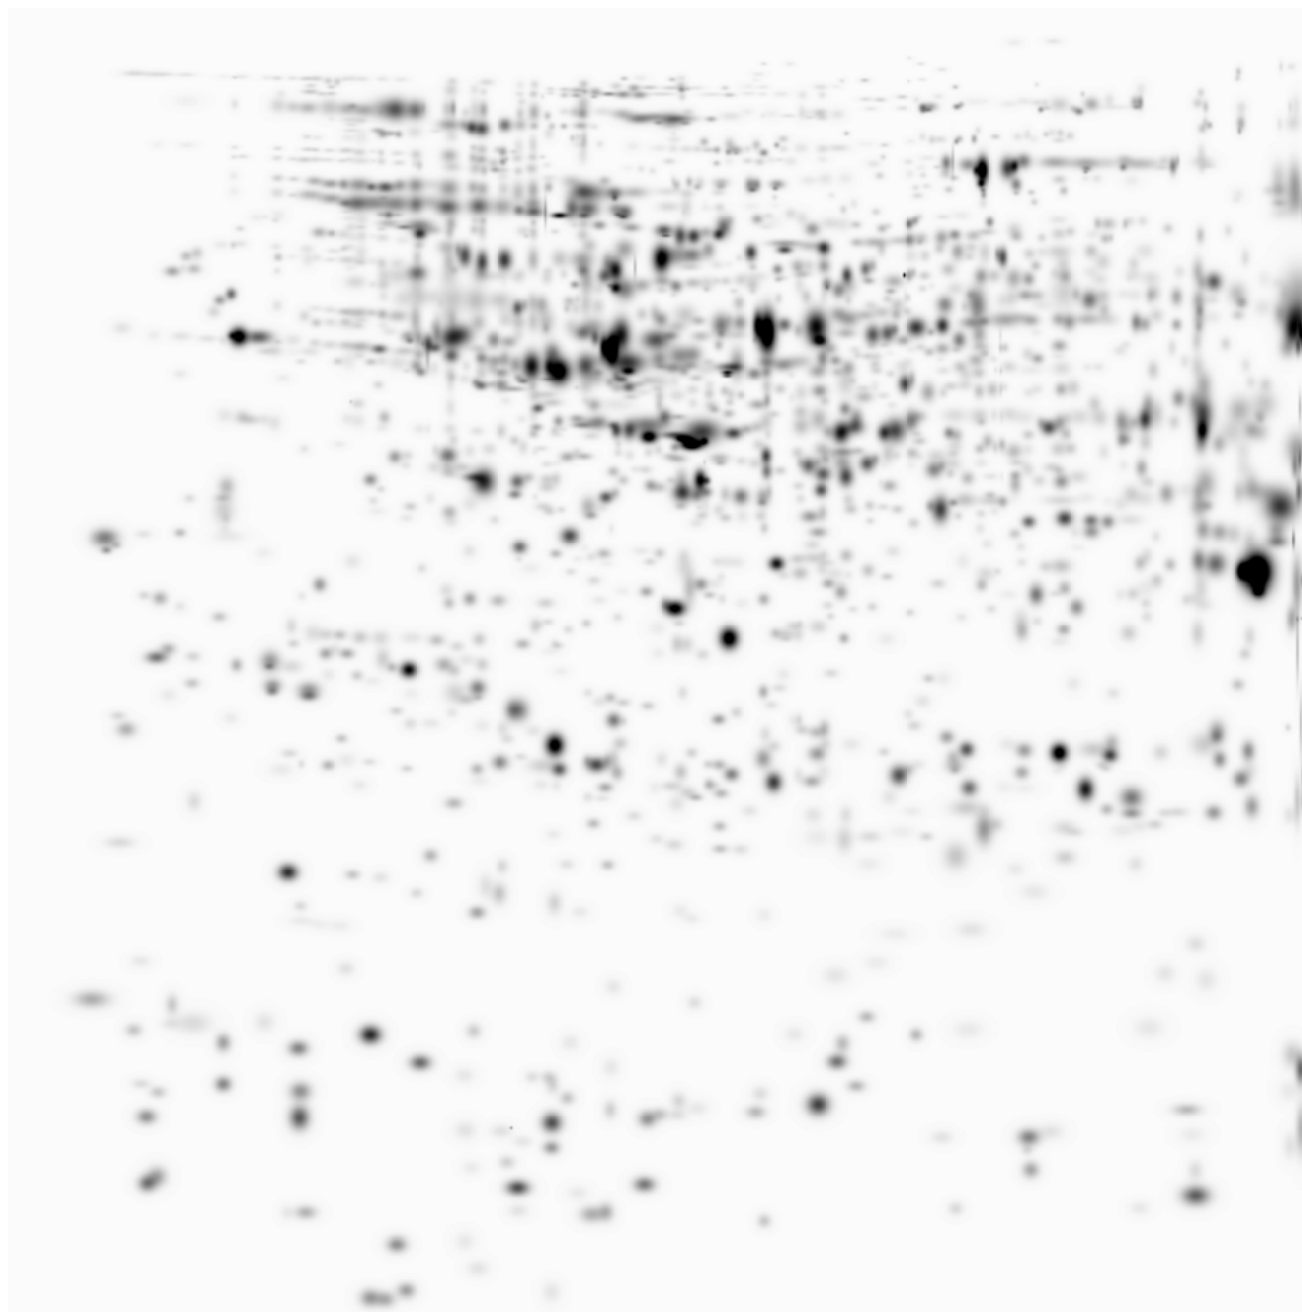

Supplement: s1 [file s1]
